# Supplementary material for: A nomogram to predict survival in patients with acute-on-chronic hepatitis B liver failure after liver transplantation
Source: PubMed Central journal article supplement — Ann Transl Med. 2021 Apr;9(7):555. doi: 10.21037/atm-20-6180 (PMC8105851; doi:10.21037/atm-20-6180), 2021-04
Supplement: atm-09-07-555-supplementary.pdf [file atm-09-07-555-supplementary.pdf]

**Table S1** Number and mortality of patients with different ACLF grades under EASL criteria

| Criteria                  | n   | Mortality, n (%) |           |           |           |
|---------------------------|-----|------------------|-----------|-----------|-----------|
|                           |     | 28-day           | 90-day    | 180-day   | 1-year    |
| HBV-ACLF (APASL criteria) | 290 | 44 (15.2)        | 61 (21.0) | 65 (22.4) | 67 (23.1) |
| HBV-ACLF (EASL criteria)  |     |                  |           |           |           |
| Non-ACLF                  | 72  | 4 (5.6)          | 7 (9.7)   | 8 (11.1)  | 8 (11.1)  |
| All ACLF grades           | 218 | 40 (18.3)        | 54 (24.8) | 57 (26.1) | 59 (27.1) |
| ACLF grade 1              | 15  | 0 (0.0)          | 1 (6.7)   | 1 (6.7)   | 1 (6.7)   |
| ACLF grade 2              | 100 | 12 (12.0)        | 16 (16.0) | 17 (17.0) | 18 (18.0) |
| ACLF grade 3              | 103 | 28 (27.2)        | 37 (35.9) | 39 (37.9) | 40 (38.8) |

ACLF, acute-on-chronic liver failure; APASL, Asian Pacific Association for the Study of the Liver; EASL, European Association for the Study of the Liver; HBV, hepatitis B virus.

**Table S2** One-year post-transplant mortality, MELD, MELD-Na, Child-Pugh score of HBV-ACLF patients with different number of organ failures

| Number of organ failure | n   | 1-year mortality | MELD              | MELD-Na          | Child-Pugh score |
|-------------------------|-----|------------------|-------------------|------------------|------------------|
| 0                       | 44  | 13.64%           | 16.5 (13.3–23.0)* | 12.4 (5.3–22.6)* | 10.0 (9.0–11.0)  |
| 1                       | 43  | 6.98%            | 29.0 (24.0–33.0)* | 30.1 (21.7–26.2) | 11.0 (10.0–12.0) |
| 2                       | 100 | 18.00%           | 35.0 (32.0–39.5)* | 34.0 (26.2–42.3) | 11.0 (10.2–12.0) |
| 3                       | 56  | 32.14%           | 39.5 (34.0–44.8)  | 36.4 (25.5–45.1) | 12.0 (11.0–13.0) |
| 4                       | 19  | 21.05%           | 42.0 (38.0–49.0)  | 37.9 (32.0–44.6) | 12.0 (12.0–13.0) |
| 5,6                     | 28  | 62.29%           | 44.5 (39.3–49.8)  | 40.6 (34.1–46.0) | 13.0 (12.0–13.0) |

\*, P value (<0.05) for comparisons between patients with one more organ failure. Where applicable, data are presented as median (interquartile range). ACLF, acute-on-chronic liver failure; HBV, hepatitis B virus; MELD, model for end-stage liver disease.

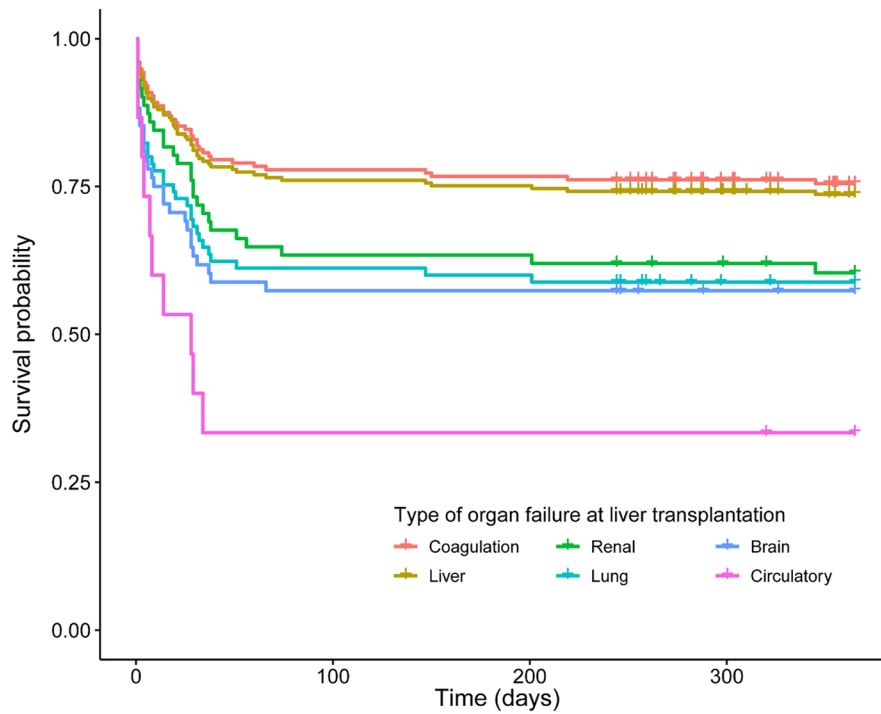

|             | Number of patients at risk |     |     |     |
|-------------|----------------------------|-----|-----|-----|
|             | 0                          | 100 | 200 | 300 |
| Coagulation | 176                        | 137 | 135 | 122 |
| Liver       | 217                        | 165 | 163 | 146 |
| Renal       | 71                         | 45  | 45  | 40  |
| Lung        | 85                         | 52  | 51  | 42  |
| Brain       | 68                         | 39  | 39  | 34  |
| Circulatory | 15                         | 5   | 5   | 5   |

**Figure S1** Patient survival probability stratified by the type of organ failure at the time of liver transplantation.

**Table S3** Twenty-eight-day, 90-day, 6-month, and 1-year post-transplant mortality of HBV-ACLF patients with different type of organ failure

| Type of organ failure | n   | 28-day mortality | 90-day mortality | 6-month mortality | 1-year mortality |
|-----------------------|-----|------------------|------------------|-------------------|------------------|
| Liver                 | 217 | 17.97%           | 23.96%           | 25.35%            | 26.27%           |
| Lung                  | 85  | 30.59%           | 38.82%           | 41.18%            | 41.18%           |
| Renal                 | 71  | 23.94%           | 36.62%           | 38.03%            | 39.44%           |
| Brain                 | 68  | 35.29%           | 42.65%           | 42.65%            | 42.65%           |
| Coagulation           | 176 | 16.48%           | 22.16%           | 23.30%            | 24.43%           |
| Cardiovascular        | 15  | 53.33%           | 66.67%           | 66.67%            | 66.67%           |

ACLF, acute-on-chronic liver failure; HBV, hepatitis B virus.

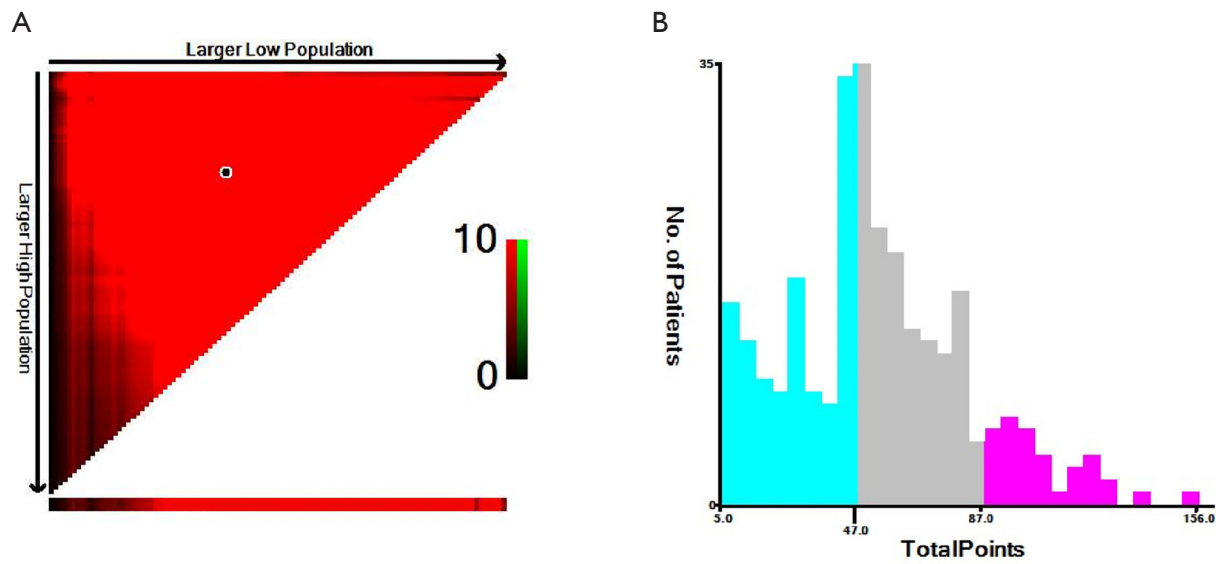

**Figure S2** Cut-off value of total points calculated using the X-tile software. Coloration of the plot (A) represents the strength of the association at each division, ranging from low (dark, black) to high (green). The trisection cut-off value (blue: 0–47.0; grey: 47.1–87.0; red:  $\geq 87.1$ ) was demonstrated on a histogram (B) of all recruited patients
